# Using eDNA methodologies to identify the presence/absence of *S. thermophilus* in yogurt products

Vladimir Bejdo<sup>a,\*</sup>, Claire Gao<sup>a</sup>,

<sup>a</sup>*University of Washington, Seattle, WA*

---

## Abstract

The advent of low-cost nuclear acid extraction allows for the creation of low-cost assays which can specifically be used to determine the presence or absence of bacteria in a variety of environments. Commercially sold dietary yogurt claims to contain bacteria forming a microbiome which has been previously linked to improved health outcomes in incidence rates of type 2 diabetes in vulnerable populations. The predicted outcome was that a main bacterial culture used in yogurt production (*S. thermophilus*) would be present and would be detectable using eDNA methodologies since it is fundamental to the making of yogurt. We gathered DNA from yogurt using yogurt dilutions and filter paper; we then extracted the DNA and also sequenced and used PCR to amplify the DNA. We sequenced PCR products to verify their identity through processing with publicly available BLAST tools which reference already accessioned bacterial genomes. Yogurt from four different commercially available brands (in the U.S.) was tested; not all

---

\*Principal corresponding author.

Email addresses: [bejdo@uw.edu](mailto:bejdo@uw.edu) (Vladimir Bejdo), [claireg5@uw.edu](mailto:claireg5@uw.edu) (Claire Gao)

yogurts tested positive for the bacteria, with higher concentrations of the bacteria in imported Greek-style yogurts, lower concentrations in domestically produced Greek-style yogurts, and no bacterial DNA detected in domestically produced 'regular' yogurt products. This research suggests that not all yogurts are equal, putting into question the whole-sale claims made on dietary yogurt's probiotic preventative health effects and calling for a more detailed analysis to determine firm causal links between the microbiota of yogurts and preventative health effects.

*Keywords:* environmental DNA, bacterial fingerprinting, *S. thermophilus*, probiotics, yogurt cultures

---

## 1. Introduction

Previous studies have shown (and advertisers often promote) the positive health impacts which seem to be correlated to eating yogurt and other fermented foods. These effects have been attributed to the probiotics which promote the fermentative processes that create these products; in dietary yogurt, these two bacteria are *L. delbrueckii ssp. bulgaricus* and *S. thermophilus* [1].

Consuming yogurt on a regular basis has been shown to reduce the risk of T2D in elderly populations at a high risk of cardiovascular disease in Spain [2]. The same effect has been found in general adult populations in the United States, where over 194 thousand adults were examined on eating habits and in particular on the types of dairy that they ate in a study which conducted meta-analysis to find similar effects caused from yogurt consumption [3]. In order for these yogurt products to have any positive

15 effect, they need to have the proper bacteria which facilitate fermentation;  
16 this study aims to introduce a methodology to prove that yogurt, a po-  
17 tential preventative against widespread disease like type 2 diabetes, as  
18 commercially sold, truly has the effects attributed to these bacteria that  
19 have been studied and publicized domestically and internationally by con-  
20 firming their presence in the yogurt microbiome.

21 No recorded efforts have been made to confirm manufacturer claims on  
22 the presence of live cultures in yogurt products. Most studies in the past  
23 that have analyzed the bacterial content of yogurt have utilized phenotypic  
24 and fermentative profiling, which is highly variable for each strain of the  
25 bacteria potentially present [4, 5]. An emerging method of bacterial identi-  
26 fication in environmental sources involves the use of DNA sequencing, or at  
27 the very least PCR/amplification. Some of the most prevalent methods for  
28 using DNA in bacterial identification involve DNA fingerprinting by test-  
29 ing through methods like random amplified polymorphic DNA (RAPD)  
30 analysis and restriction fragment-length polymorphism (RFLP) analysis  
31 [6, 7, 8, 9]—both methods that can produce results even when the specifics  
32 of the sample tested are not well known [10]. However, these methods may  
33 produce wildly variable PCR products, are at times resource-heavy, and  
34 are not always reproducible due to protocols that are extremely dependent  
35 on individual testing and laboratory conditions [11]. Due to these issues,  
36 these methods are sometimes not seen as stable enough to be used as  
37 stand-alone methods [12], and are often accompanied with existing profil-  
38 ing methods. DNA sequencing has, however, advanced to the point where  
39 we can create species specific primers for the particular and replicable am-

40 plification of bacterial DNA samples, potentially negating the need for a  
41 hyper-general testing method. Methods recently used for the isolation of  
42 environmental DNA have become increasingly cost effective, costing a few  
43 cents per sample identified, and can provide quick and certain results [13].

44 To make use of this technology, we have conducted preliminary test-  
45 ing of commercially available dietary yogurts in order to begin to form  
46 a consistent, cost-effective methodology for the use of eDNA methods in  
47 the identification of probiotics in yogurt. This paper comes to preliminary  
48 conclusions and suggestions for further research to help protect trade and  
49 consumer interests by pointing out potential false advertising, and sug-  
50 gests that this methodology provides an opportunity to more definitively  
51 prove causation between these bacteria and the effects of yogurt on vulner-  
52 able groups by proving whether or not these bacteria are actually present  
53 in the disease-preventative yogurt noted in literature.

## 54 **2. Methodology**

55 This section outlines the methodology used in yogurt sample collection,  
56 DNA extraction, amplification, sequencing, and sequence processing.

57 In order to conduct this experiment, four different brands of commer-  
58 cially available yogurt products (available at time of publication in Seattle,  
59 WA) were used. The four yogurts tested were Fage's *Total* (an imported  
60 Greek yogurt product), Chobani Plain Yogurt, Greek Gods Greek Yogurt  
61 (domestic Greek yogurt products), and Yoplait Original Strawberry (a do-  
62 mestic yogurt product). All the brands claim to have been produced using  
63 starter cultures containing both tested bacteria, and claim to have 'live and

64 active' cultures.

### 65 2.1. *Sample collection*

66 Samples were prepared for collection by preparing a 1:25 dilution in a  
67 test tube; this was done by taking 0.5 mL of yogurt and adding it to 12 mL  
68 of distilled water. This mixture is then capped and agitated for about 30  
69 seconds. Precipitation may be present; this does not affect the overall sam-  
70 ple quality. For the actual collection process, a piece of standard Whatman  
71 Grade 1 (15mm diameter) qualitative filter paper is placed into the mixture  
72 for 30 seconds with forceps, retrieved, and stored in an appropriately sized  
73 (2 mL) screw capped microcentrifuge tube with 1 mL of NP-40 lysis buffer  
74 for storage. This process allows for the DNA to be isolated and quickly  
75 prepared for extraction shortly after sampling. Alternatively, samples from  
76 the solution can be pipetted onto the filter paper for storage; the 'dipping'  
77 method allows for less specialized tools to be used to achieve the same  
78 effect, and is the one used in this experiment.

### 79 2.2. *DNA extraction/purification*

80 DNA extraction/purification was performed with a method similar to  
81 the one found in the article *Nucleic acid purification from plants, animals*  
82 *and microbes in under 30 seconds* which calls for directly dipping a dipstick  
83 exposed to the sample to an amplification reaction after a few dips in a wash  
84 buffer [13]. Instead, to extract as much DNA as possible from samples and  
85 additionally keep material costs down, a small (roughly 1 cm x 1 cm large)  
86 piece of the original filter paper was placed into 500  $\mu$ L Tris buffer and then  
87 incubated in 200  $\mu$ L of distilled water in order to extract DNA off the filter

88 paper. This allows for sufficient time to have a solution that can be used  
89 for amplification.

### 90 2.3. PCR amplification

91 The particular PCR beads used to perform PCR amplification were  
92 General Electric's illustra™ PuReTaq™ Ready-To-Go™ PCR beads. The  
93 procedure is performed as standard—adding a reaction bead, 1 μL of each  
94 forward and reverse primer for the desired bacteria, 18 μL of water, and  
95 5 μL of the DNA template prepared in the previous stage into a 200 μL  
96 Eppendorf tube.

### 97 2.4. Primers

98 Primers were designed using publicly available accessioned bacterial  
99 genomes for *S. thermophilus* using NCBI's Primer-BLAST. The forward  
100 primer is GCT TTA GGG CTA GCG TCG AT, while the reverse primer  
101 is TAG GTC CCG ACT AAC CCA GG, listed in 5' → 3' order. The ex-  
102 pected product length was listed as 524 base pairs.

103 The following table lists additional information regarding the primers  
104 designed, including length, melting and annealing temperatures ( $T_m$  and  
105  $T_a$ ), GC content, and folding  $T_m$ .

Table 1: **Primer Data.** This table details pertinent primer design data for the primers used in this experiment, both forward and reverse.

| Primer                           | $T_m$ , °C | $T_a$ , °C | GC content | Folding $T_m$ , °C |
|----------------------------------|------------|------------|------------|--------------------|
| <i>S. thermophilus</i> , forward | 57.1       | 52.1       | 55.00%     | 25.3               |
| <i>S. thermophilus</i> , reverse | 57.9       | 52.9       | 60.00%     | 29.2               |

106 Primers were resuspended from the lyophilized form in which they  
107 were delivered by the addition of molecular grade water to create a working  
108 stock; 275  $\mu$ L of water was added for the forward primer, and 283  $\mu$ L of  
109 water was added for the reverse primer.

#### 110 *2.5. PCR purification, gel electrophoresis, sequencing*

111 All of these steps were performed by an external genomics service/CRO,  
112 Genewiz, LLC in South Plainfield, New Jersey. PCR products were puri-  
113 fied by magnetic bead-based clean up, and were sequenced with standard  
114 Sanger sequencing methodologies.

#### 115 *2.6. Sequence processing*

116 In order to produce FASTA files from .ab1 files (files containing elec-  
117 tropherograms and base sequences), the program SnapGene Viewer was  
118 used. The FASTA files produced from the electropherograms were then  
119 processed through both the publicly available National Center for Biotech-  
120 nology Information (NCBI) and Kyoto Encyclopedia of Genes and Genomes  
121 (KEGG) databases through their respective BLAST tools in order to identify  
122 and verify the identity of the sequenced DNA.

### 123 **3. Results**

#### 124 *3.1. Gel electrophoresis results*

125 The results for gel electrophoresis are located in Figure 1. The figures  
126 are labeled with a short-hand labelling convention; this is in the form of  
127 [brand name], [first letter of bacterial genus tested]. Each brand name is  
128 also abbreviated; Chobani is CHOB, Greek Gods Greek Yogurt is GGGY,

129 Yoplait is YPLT, and Fage remains FAGE. Unlabeled wells indicate results  
130 which do not belong to this experiment. For *S. thermophilus*, Chobani,  
131 Greek Gods Yogurt, and Fage give positive gel results, while Yoplait gives  
132 a negative result.

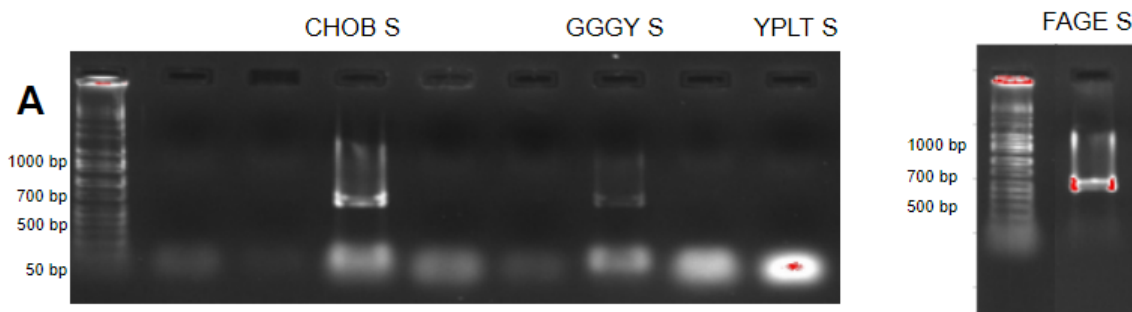

Figure 1: **Annotated electrophoresis results.** Row A contains all the electrophoresis results for *S. thermophilus*. CHOB S, GGGY S, and FAGE S were positive and are marked by red boxes. The e-gel DNA ladder from each gel is labeled with rough indicators of amplicon size in number of base pairs (bp). The results for FAGE S are shown separately as they were processed on a separate gel.

133 The samples provided varying degrees of primer hybridization, espe-  
134 cially in samples that provided visually weaker results. Stronger results  
135 are indicated by both stronger (whiter) bands in the gel result, and red  
136 marks indicate results with greater concentrations of DNA. This suggests  
137 greater concentrations of DNA product in the FAGE S sample, followed by  
138 the CHOB S and GGGY S samples respectively.

### 139 3.2. BLAST results (sequence identification)

140 After processing with publicly available BLAST tools from both NCBI  
141 and KEGG resources, all successful amplifications were identified as match-



142 ing with other existing accessioned *S. thermophilus* samples. Table ?? lists  
143 a compiled record of accession numbers and match information for the  
144 primary matches of each sample sequenced and referenced against NCBI  
145 and KEGG databases. This data is accurate as of March 3rd, 2018.

146 The products of the Fage and Chobani samples all fully match to the  
147 same genome sample for *S. thermophilus* in the NCBI database, as indicated  
148 by a 100 percent identity percentage match to accession CP025400.1. The  
149 products of the Greek Gods Greek Yogurt sample indicate a 99 percent  
150 identity percentage match in the NCBI database to accession MG825731.1 (a  
151 partial sequence of *S. thermophilus* from the 16S-rRNA region of a bacterial  
152 sample).

## 153 **4. Discussion of results**

### 154 *4.1. Result accuracy*

155 *Yoplait sample.* The negative result for the Yoplait sample may be inter-  
156 preted as no bacteria present in the sample; it may also be interpreted  
157 as being a false-negative due to a lack of bacterial DNA in the particular  
158 sample taken, and not in the yogurt itself. There is also a potential for  
159 false-negatives due to poor reaction performance; however, this might not  
160 be the case as the protocol followed is the same for all samples taken (3 of  
161 which were successful) and is based on a proven protocol for the detection  
162 of eDNA. There may very well have been no detectable bacterial DNA in  
163 the yogurt; evidently enough, the primers simply reproduced themselves  
164 (resulting in a strong band near the bottom of the gel image). While the  
165 yogurt claimed to include live and active cultures, no specifics were listed

166 in the ingredients list on the yogurt tested itself.

167 *Primers and their role in testing.* The primers seem to have been non-specific  
168 enough to reproduce part of the 16S rRNA gene in one of the samples,  
169 which was not necessarily the original target sequence of the primers when  
170 they were created. At the very least, this could mean that the primers are  
171 not specific to a particular commercial strain of *S. thermophilus*, meaning  
172 that they can be used to amplify more strains and can be used on a wider  
173 range of commercially available commercial yogurt. However, they are are  
174 non-specific enough to reproduce at least two differing regions of the same  
175 bacterial genome.

#### 176 4.2. Contaminants and culture amounts from the point of production

177 *Yogurt contents and detection.* It seems that all yogurts are simply not made  
178 equal. Commercially sold dietary yogurt products could variably contain  
179 substances that make it harder to determine the presence/absence of their  
180 claimed bacterial cultures.

181 The strongest bands and consistent results come from yogurts that  
182 only list two sets of ingredients; the Fage and Chobani-branded plain  
183 yogurt products tested sampled only list milk and yogurt cultures as their  
184 ingredients. Greek Gods Greek Yogurt, the one yogurt with a smaller  
185 match percentage to a more general gene of the bacteria, contained cream  
186 and pectin in addition to milk and yogurt cultures. These were most likely  
187 placed in the yogurt as thickeners.

188 The one negative result comes from Yoplait yogurt, which most promi-  
189 nently of various thickeners (such as pectin, gelatin, starches, corn syrups,

190 and other oils), flavorings, and colorants. The yogurt tested was Yoplait  
191 Original Strawberry; while it claimed to contain live cultures, these were  
192 not explicitly listed on the ingredient list.

193 It is very likely that the presence of these other substances may cause  
194 issues in the detection of bacterial DNA, whether or not those bacteria are  
195 actually dead or living. Issues of contamination could also be the cause  
196 of the weaker bands in the Yoplait and Greek Gods samples; both of these  
197 samples have more ingredients that could dilute the presence of these  
198 bacterial cultures in yogurt.

## 199 **5. Conclusions**

### 200 *5.1. Re-evaluating links between yogurt, probiotics, and health impacts*

201 The uneven set of results raises concerns over the importance of bacte-  
202 rial concentration and the actual composition of yogurt biota on the effects  
203 of dietary yogurt. If yogurt with almost undetectable amounts of DNA  
204 present for probiotic strains of bacteria is credited for providing positive  
205 health impacts, are the bacteria themselves the beneficial agents making  
206 yogurt a preventative for disease? Or, are bacterial byproducts (the fer-  
207 mented yogurt itself) the actual source of these positive health impacts?

208 DNA testing through this cost-effective method could provide a gold-  
209 standard for bacterial identification for the biota present in dietary prod-  
210 ucts. With DNA quantification methods, one could further determine the  
211 actual concentration and quality of DNA present in each sample mixture.

212 However, it might be more useful in certain cases to pursue further  
213 research through cell culturing of yogurt products to both provide a more

214 complete picture of a commercial yogurt's biome and make more general-  
215 ized statements about the realities of the probiotic value of commercially  
216 sold yogurt. The contaminants which we speculated over may affect DNA  
217 testing for bacteria, but not culturing; we can attempt to determine the  
218 actual rate at which probiotics are present in dietary yogurt in order to de-  
219 termine whether it is the probiotics being live in the yogurt sold or simply  
220 the product of fermentative processing (yogurt itself, with or without live  
221 cultures) that provides these speculated benefits.

222 Specialized testing through DNA methods is most useful to come to  
223 important research leads about the causal link between bacteria and these  
224 positive health effects. More extensive testing on larger batches of yogurt  
225 could provide a better idea of overall product quality and consistency, lead-  
226 ing to a baseline for consideration by nutritional and health researchers to  
227 further specify proven causal relationships between probiotics and human  
228 health benefits. The low cost and time required to prepare and process  
229 samples from the point of collection could also promote more consumer-  
230 oriented research into the quality of products sold; and, if this technology  
231 indeed is used to prove that there is a strong causal link between *S. ther-*  
232 *mophilus* and human health effects, could inform the creation of actionable  
233 points to reinforce recommendations on issues of public and preventative  
234 health, and could also lead to better decisions for consumers who try to  
235 take advantage of probiotics in products sold to them.

236 **Competing financial interests**

237 There are no competing interests to declare.

238 **Data availability**

239 All the data related to this set of experiments is included in this article as  
240 part of the text, as figures, or in the supporting information provided in the  
241 text. Additional supplementary files analyzed in this set of experiments  
242 have also been released.

243 **Supporting Information**

244 **S1: FASTA file, FAGE S**

245 This is a copyable version of the FASTA file for FAGE S which was  
246 interpreted from a chromatogram and used for BLAST.

247 >FAGE SAMPLE STREPTOCOCCUS THERMOPHILUS  
248 AACGCATTAAGCACTCCGCCTGGGGAGTACGACCGCAAGGTTGAAACTCAAAGGAATTGAC  
249 GGGGGCCCGCACAAGCGGTGGAGCATGTGGTTTAATTCGAAGCAACGCGAAGAACCTTACC  
250 AGGTCTTGACATCCCGATGCTATTTCTAAAGATAGAAAAGTTACTTCGGTACATCGGTGACA  
251 GGTGGTGCATGGTTGTCGTCAGCTCGTGTGTCGTGAGATGTTGGGTTAAGTCCCGCAACGAGC  
252 GCAACCCCTATTGTTAGTTGCCATCATTAGTTGGGCACTCTAGCGAGACTGCCGTAATA  
253 AACCGGAGGAAGGTGGGGATGACGTCAAATCATCATGCCCTTATGACCTGGGCTACACAC  
254 GTGCTACAATGGTTGGTACAACGAGTTGCGAGTCGGTGACGGCGAGCTAATCTCTTAAAGC  
255 CAATCTCAGTTCGGATTGTAGGCTGCAACTCGCCTACATGAAGTCGGAATCGCTAGTAATC  
256 GCGGATCAGCACGCCCGGTGAATACGTTCCCGGGCCTTGTACACACCGCCCGTCACACCA  
257 CNAGAGTTTGTAAACCCGAAGTCGGTGAGGTAACCTTTTGGAGCCAGCCGCCTAAGGTGG  
258 GACANATGATTGGGGTGAAGTCGTAACAAGG

259 **S2: FASTA file, CHOB S**

260 This is a copyable version of the FASTA file for CHOB S which was  
261 interpreted from a chromatogram and used for BLAST.

262 >CHOB SAMPLE STREPTOCOCCUS THERMOPHILUS  
263 AAGGTTGAAACTCAAAGGAATTGACGGGGCCCGCACAAGCGGTGGAGCATGTGGTTTAAT  
264 TCGAAGCAACGCGAAGAACCTTACCAGGTCTTGACATCCCGATGCTATTTCTAGAGATAGA  
265 AAGTTACTTCGGTACATCGGTGACAGGTGGTGCATGGTTGTCGTCAGCTCGTGTGAGAGA

266 TGTTGGGTAAAGTCCCGCAACGAGCGCAACCCCTATTGTTAGTTGCCATCATTAGTTGGG  
267 CACTCTAGCGAGACTGCCGGTAATAAACCGGAGGAAGGTGGGGATGACGTCAAATCATCAT  
268 GCCCCTTATGACCTGGGCTACACACGTGCTACAATGGTTGGTACAACGAGTTGCGAGTCGG  
269 TGACGGCGAGCTAATCTCTTAAAGCCAATCTCAGTTCGGATTGTAGGCTGCAACTCGCCTA  
270 CATGAAGTCGGAATCGCTAGTAATCGCGGATCAGCACGCCCGGTGAATACGTTCCCGGGC  
271 CTTGTACACACCGCCCGTCACACCACGAGAGTTTGTAAACCCGAAGTCGGTGAGGTAACC  
272 TTTTGGAGCCAGCCGCCTAAGGTGGGACAGATGATTGGGGTGAAGTCGTAACAAG

273 **S3: FASTA file, GGGY S**

274 This is a copyable version of the FASTA file for GGGY S which was  
275 interpreted from a chromatogram and used for BLAST.

276 >GGGY SAMPLE STREPTOCOCCUS THERMOPHILUS  
277 ACGACCGCAAGGTTGAAACTCAAAGGAATTGACGGGGGCCCGCACAAGCGGTGGAGCATGT  
278 GGTTTAATTCGAAGCAACGCGAAGAACCTTACCAGGTCTTGACATCCCGATGCTATTTCTA  
279 AAAATAGAAAGTTACTTCGGTACNTCGGTGACAGGTGGTGCATGGTTGTCGTCAGCTCGTG  
280 TCGTGAGATGTTGGGTAAAGTCCCGCAACGAGCGCAACCCCTATTGTTAGTTGCCATCATT  
281 CAGTTGGGCACTCTAACGAGACTGCCGGTAATAAACCGGAGGAAGGTGGGGATGACGTCAA  
282 ATCATCATGCCCTTATGACCTGGGCTACACACGTGCTACAATGGTTGGTACAACGAGTTG  
283 CGAGTCGGTGACGGCGAGCTAATCTCTTAAAGCCNATCTCAGTTCGGATTGTAGGCTGCAA  
284 CTCGCCTACATGAAGTCGGAATCGCTAGTAATCGCGGATCAGCACGCCCGGTGAATACGT  
285 TCCCGGGCCTTGTACACACCGCCCGTCACACCNNAGAGTTTGTANNNNNCGAAGTCGGTG  
286 AGGTAACCTTTTGGAGCCAGCCGCCTAAGGTGGGACAGATGATTGGGGTGAAGTCGTAACA

287 **S4: .zip archive, chroma\_STherm.zip**

288 This archive contains the chromatogram files for each sample tested.

289 The following is a list of the zip-file's contents.

290 *FAGE\_S-Stherm.ab1*. A file containing a full chromatogram for the Fage  
291 sample, which can be viewed using many different programs dedicated to  
292 viewing chromatograms and can also be converted to FASTA files as was  
293 done in this paper.

294 *CHOB\_S-Stherm.ab1*. A file containing a full chromatogram for the Chobani  
295 sample.

296 *GGGY\_S-Stherm-ab1*. A file containing a full chromatogram for the Greek  
297 Gods Greek Yogurt sample.



298 **References**

- 299 [1] M. L. Marco, D. Heeney, S. Binda, C. J. Cifelli, P. D. Cotter, B. Foligné,  
300 M. Gänzle, R. Kort, G. Pasin, A. Pihlanto, E. J. Smid, R. Hutkins, Health  
301 benefits of fermented foods: microbiota and beyond, *Current Opin-*  
302 *ion in Biotechnology* 44 (2017) 94 – 102, food biotechnology • Plant  
303 biotechnology. doi:<https://doi.org/10.1016/j.copbio.2016.11.010>.  
304 URL [http://www.sciencedirect.com/science/article/pii/](http://www.sciencedirect.com/science/article/pii/S095816691630266X)  
305 [S095816691630266X](http://www.sciencedirect.com/science/article/pii/S095816691630266X)
- 306 [2] A. Díaz-López, M. Bulló, M. Martínez-González, D. Corella, R. Es-  
307 truch, M. Fitó, E. Gómez-Gracia, M. Fiol, F. J. De la Corte, E. Ros,  
308 N. Babio, L. Serra-Majem, X. Pinto, M. Muñoz, F. Francés, P. Buil-  
309 Cosiales, J. Salas-Salvadó, Dairy product consumption and risk of  
310 type 2 diabetes in an elderly spanish mediterranean population at  
311 high cardiovascular risk, *European journal of nutrition* 55.
- 312 [3] M. Chen, Q. Sun, E. Giovannucci, D. Mozaffarian, J. E. Manson, W. C.  
313 Willett, F. B. Hu, Dairy consumption and risk of type 2 diabetes: 3  
314 cohorts of us adults and an updated meta-analysis, *BMC Med* 12  
315 (2014) 215, 215[PII]. doi:10.1186/s12916-014-0215-1.  
316 URL <http://www.ncbi.nlm.nih.gov/pmc/articles/PMC4243376/>
- 317 [4] V. Xanthopoulos, D. Petridis, N. Tzanetakis, Characterization and  
318 classification of streptococcus thermophilus and lactobacillus del-  
319 brueckii subsp. bulgaricus strains isolated from traditional greek yo-  
320 gurts, *Journal of Food Science* 66 (5) 747–752. doi:10.1111/j.1365-  
321 2621.2001.tb04632.x.

322 URL <https://onlinelibrary.wiley.com/doi/abs/10.1111>  
323 [/j.1365-2621.2001.tb04632.x](https://onlinelibrary.wiley.com/doi/abs/10.1111/j.1365-2621.2001.tb04632.x)

324 [5] F. de Vin, P. Rådström, L. Herman, L. De Vuyst, Molecular and  
325 biochemical analysis of the galactose phenotype of dairy strep-  
326 tococcus thermophilus strains reveals four different fermentation  
327 profiles, *Applied and Environmental Microbiology* 71 (7) (2005)  
328 3659–3667. arXiv:<https://aem.asm.org/content/71/7/3659.full.pdf>,  
329 doi:10.1128/AEM.71.7.3659-3667.2005.

330 URL <https://aem.asm.org/content/71/7/3659>

331 [6] M. C. Collado, M. Hernández, Identification and differentiation of  
332 lactobacillus, streptococcus and bifidobacterium species in fermented  
333 milk products with bifidobacteria, *Microbiological Research* 162 (1)  
334 (2007) 86 – 92. doi:<https://doi.org/10.1016/j.micres.2006.09.007>.

335 URL [http://www.sciencedirect.com/science/article/pii](http://www.sciencedirect.com/science/article/pii/S0944501306001133)  
336 [/S0944501306001133](http://www.sciencedirect.com/science/article/pii/S0944501306001133)

337 [7] G. Moschetti, G. Blaiotta, M. Aponte, P. Catzeddu, F. Villani, P. Deiana,  
338 S. Coppola, Random amplified polymorphic dna and amplified ribo-  
339 somal dna spacer polymorphism: powerful methods to differentiate  
340 streptococcus thermophilus strains., *Journal of Applied Microbiology*  
341 85 (1) (1998) 25–36. doi:10.1046/j.1365-2672.1998.00461.x.

342 [8] G. Moschetti, G. Blaiotta, F. Villani, S. Coppola, E. Parente, Com-  
343 parison of statistical methods for identification of streptococcus ther-  
344 mophilus, enterococcus faecalis, and enterococcus faecium from ran-  
345 domly amplified polymorphic dna patterns, *Appl Environ Micro-*

- 346        *biol* 67 (5) (2001) 2156–2166, 1606[PII]. doi:10.1128/AEM.67.5.2156-  
347        2166.2001.  
348        URL <http://www.ncbi.nlm.nih.gov/pmc/articles/PMC92850/>
- 349 [9] P. Ivanova, S. Peykov, A. Dimitrova, S. Dimov, Molecular typ-  
350        ing by genus-specific pcr and rapd profiling of diverse lactobacil-  
351        lus delbrueckii strains isolated from cow, sheep and buffalo yo-  
352        ghurts, *Biotechnology & Biotechnological Equipment* 22 (2) (2008)  
353        748–753. arXiv:<https://doi.org/10.1080/13102818.2008.10817545>,  
354        doi:10.1080/13102818.2008.10817545.  
355        URL <https://doi.org/10.1080/13102818.2008.10817545>
- 356 [10] J. Welsh, M. McClelland, Fingerprinting genomes using pcr with ar-  
357        bitrary primers, *Nucleic acids research* 18 (24) (1990) 7213–7218.
- 358 [11] G. A. Penner, A. Bush, R. Wise, W. Kim, L. Domier, K. Kasha,  
359        A. Laroche, G. Scoles, S. J. Molnar, G. Fedak, Reproducibility of ran-  
360        dom amplified polymorphic dna (rapd) analysis among laboratories.,  
361        *Genome Research* 2 (4) (1993) 341–345. doi:10.1101/gr.2.4.341.  
362        URL <http://genome.cshlp.org/content/2/4/341.abstract>
- 363 [12] V. Plengvidhya, F. Breidt Jr, H. Fleming, Use of RAPD-PCR as a  
364        method to follow the progress of starter cultures in sauerkraut fer-  
365        mentation, *International journal of food microbiology* 93 (3) (2004)  
366        287–296.
- 367 [13] Y. Zou, M. G. Mason, Y. Wang, E. Wee, C. Turni, P. J. Blackall,  
368        M. Trau, J. R. Botella, Nucleic acid purification from plants, animals

369 and microbes in under 30 seconds, PLOS Biology 15 (11) (2017) 1–22.

370 doi:10.1371/journal.pbio.2003916.

371 URL <https://doi.org/10.1371/journal.pbio.2003916>
